# Supplementary material for: Creating Novel Activated Factor XI Inhibitors through Fragment Based Lead Generation and Structure Aided Drug Design
Source: PLoS One. 2015 Jan 28;10(1):e0113705. doi: 10.1371/journal.pone.0113705 (PMC4309560; doi:10.1371/journal.pone.0113705)

**Supporting Information**

**Contents:**

1. Additional chemistry materials and methods information S2
2. Scheme S1. Synthesis of compound **4** S3
3. NMR spectra of manuscript compounds S4-S19
4. **Additional chemistry materials and methods information**

Chemicals and solvents from commercially available sources were purchased and used without further purification. High-resolution mass spectrometry (HRMS) analysis was performed using a Waters XEVO-qTOF instrument (Waters, Milford, USA) with MassLynx 4.1 software. If necessary, the purity was determined by ultra high performance liquid chromatography (U(H)PLC). Purity of all final compounds was 95% or higher at 210 nm. The instrument was a Waters U(H)PLC Acquity system (Binary pump, Sample Manager, Column Compartment and UV-PDA detector). The column was a Waters Acquity BEH C18, 1.7 μm particle size (100 mm × 2.1 mm).

Compounds **1**, **2**, **9**, **10**, **11** and **27** were obtained from the AstraZeneca corporate compound collection, compounds **3**, **5**, **6**, **7**, **12**, **17**, and **19** were commercially available and compounds **9**30, **10**30 and **11**29 were synthesized according to literature. Experimental and spectroscopic details for all other non-commercially available compounds are reported in the experimental section and their 1H NMR spectras can be found below.

Preparative HPLC was performed on various Waters systems using Kromasil C8 columns (10 μm 250x20 ID mm or 10 μm 250x50 ID mm), with a suitable gradient of acetonitrile in H2O/acetonitrile/formic acid over 20-30 minutes and a flow of 19 or 100 mL/min respectively. The compounds were detected by UV at 236, 240, 248, 261, or 270 nm.

1. **Scheme S1. Synthesis of compound 4**

**N-(3-(2-(2-aminoethoxy)ethoxy)phenyl)-6-carbamimidoyl-4-(pyrimidin-2-ylamino)-2-naphthamide (4)** was synthesized in an 8 step sequence from methyl 6-cyano-2-naphthoate according to the sequence described in **Scheme S1**.

**Scheme S1.**

1. **NMR spectra of manuscript compounds**


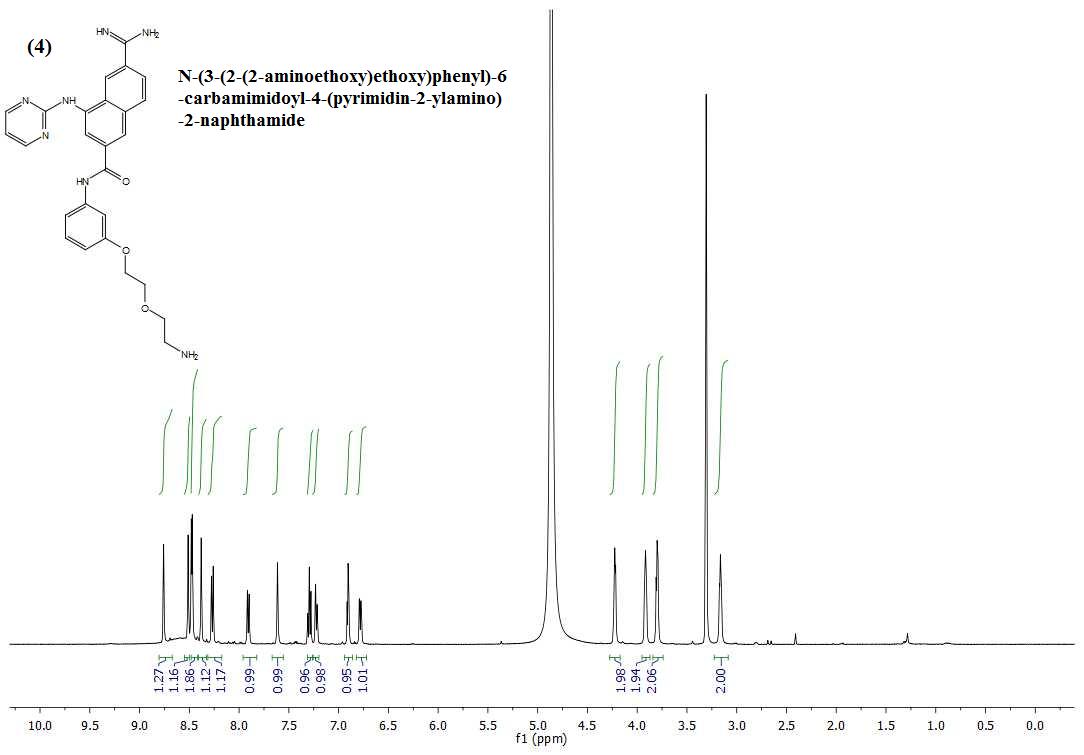


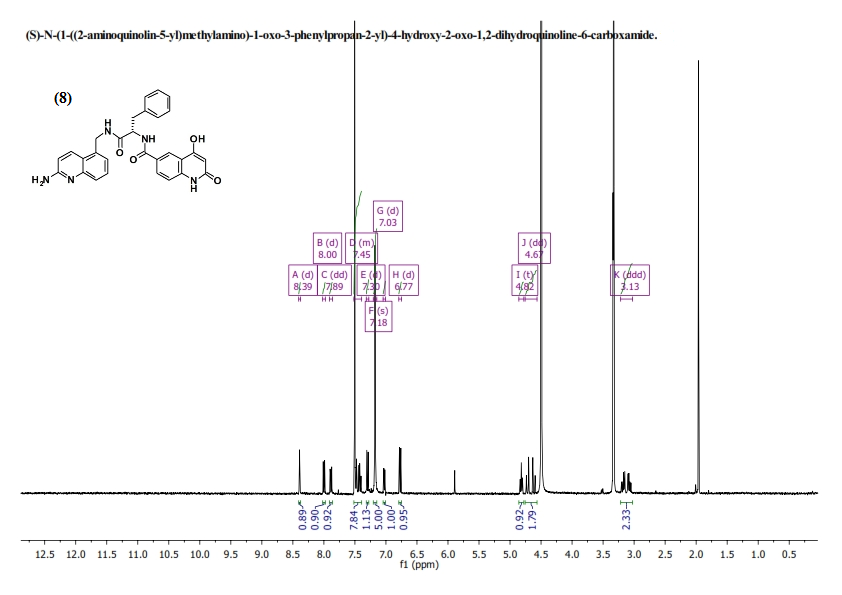


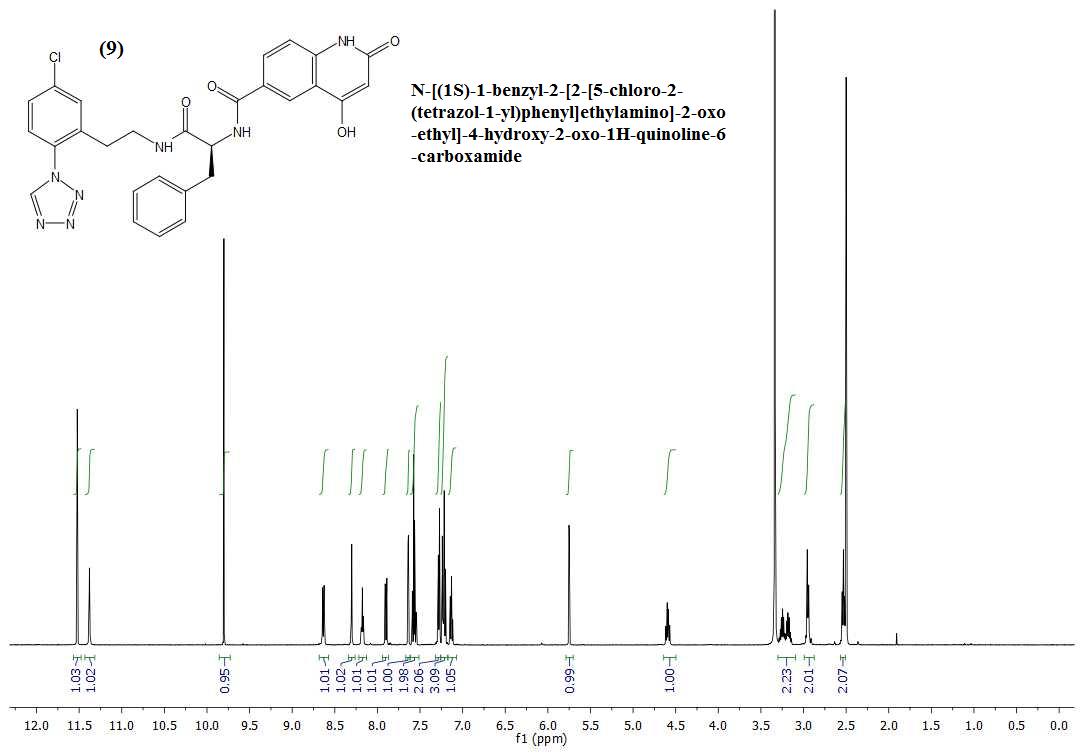


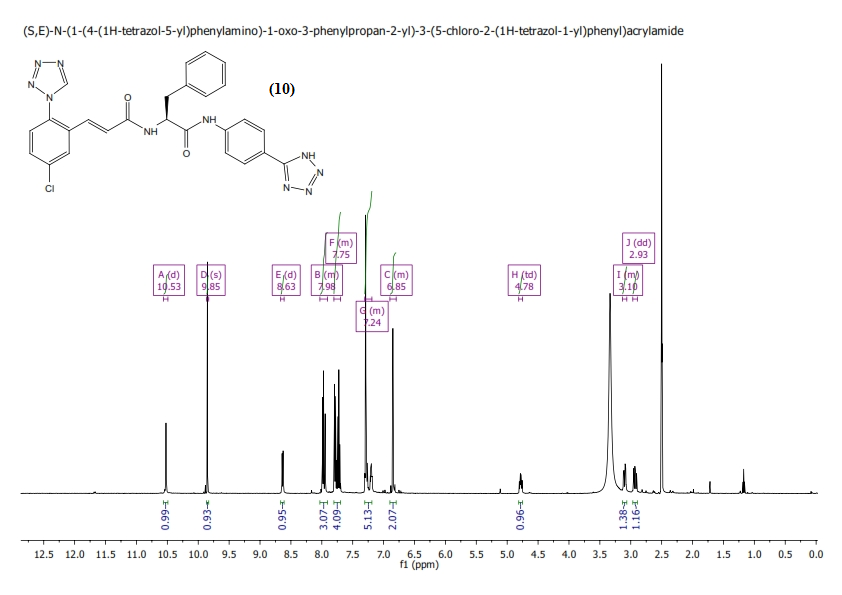


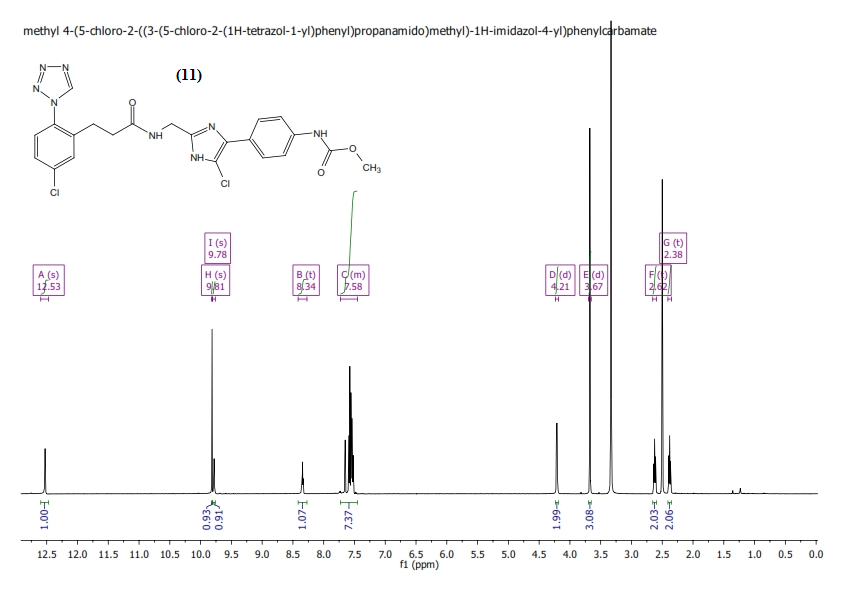


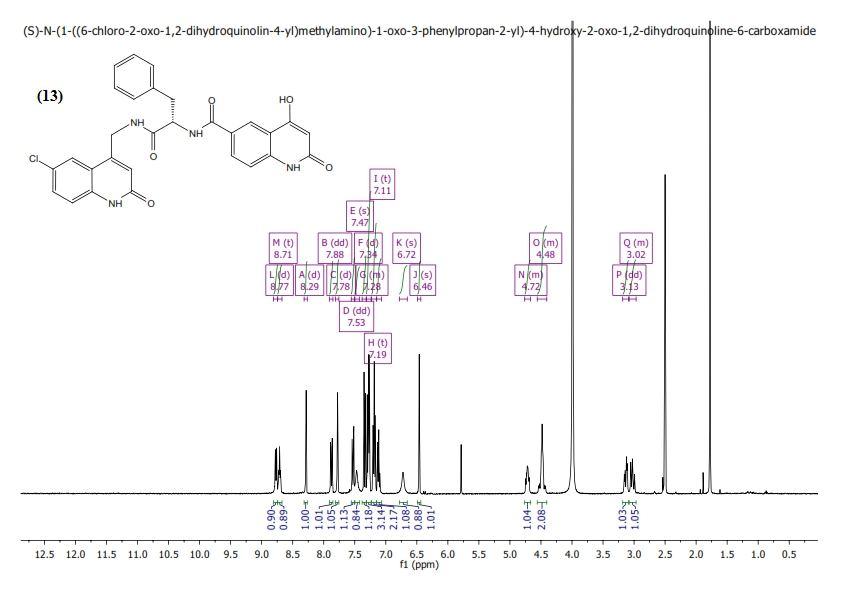


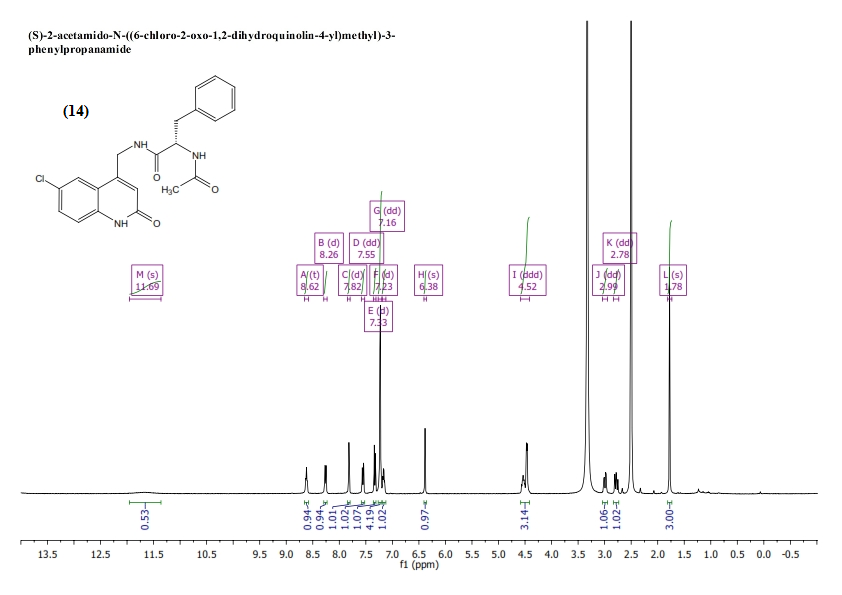


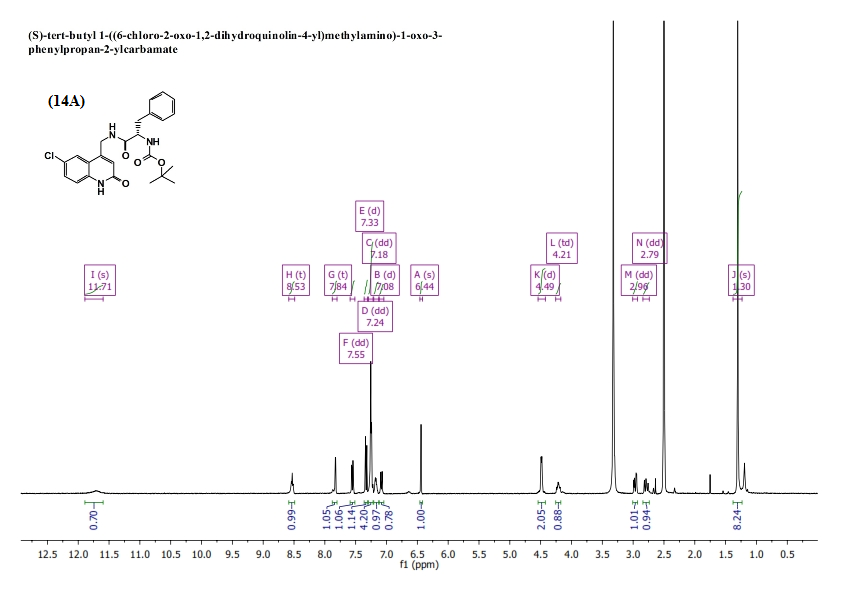


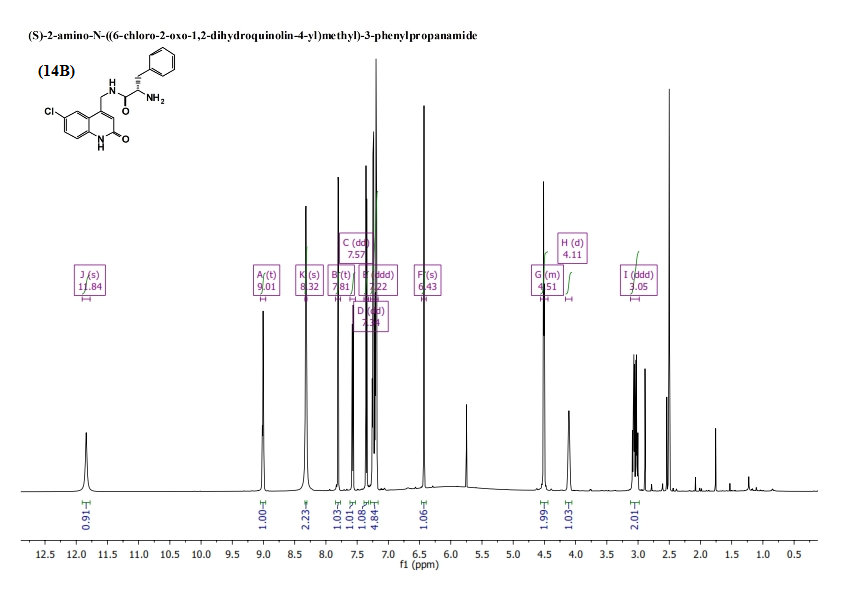


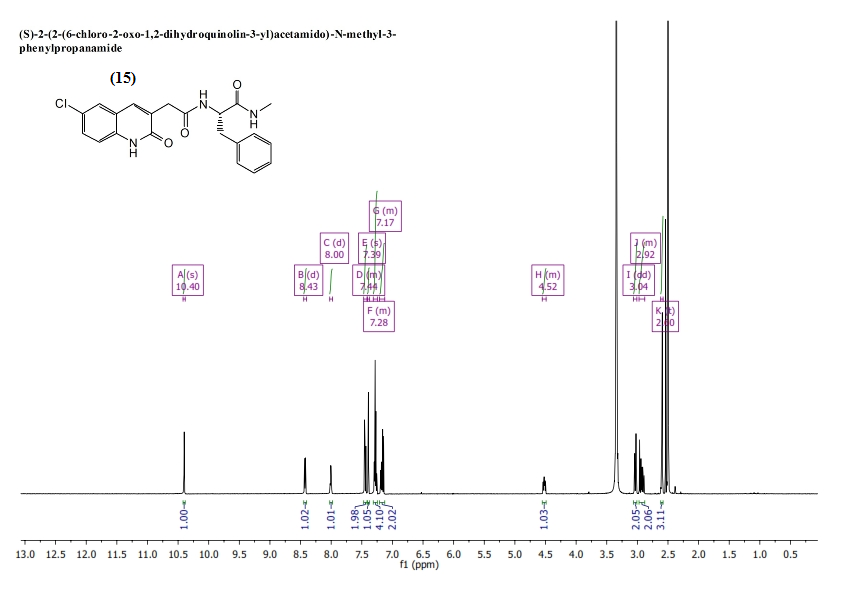


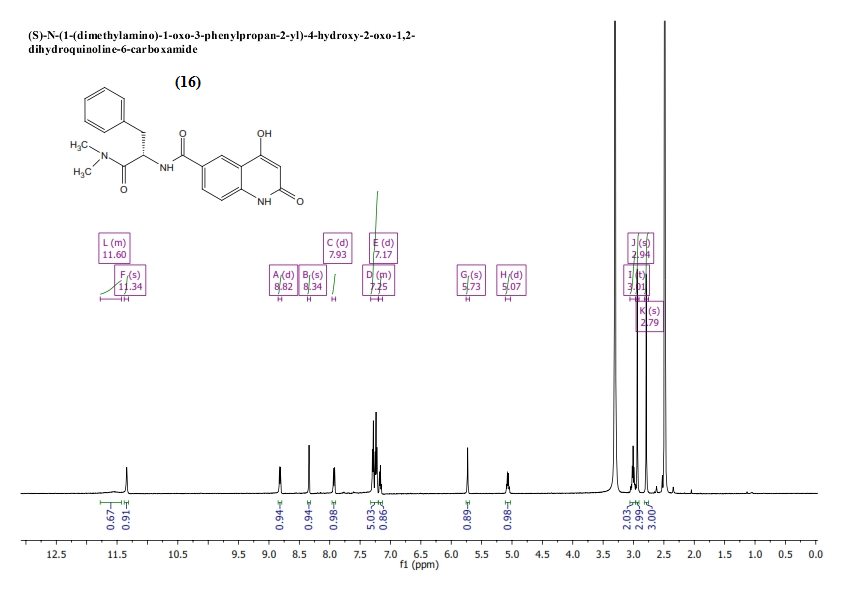


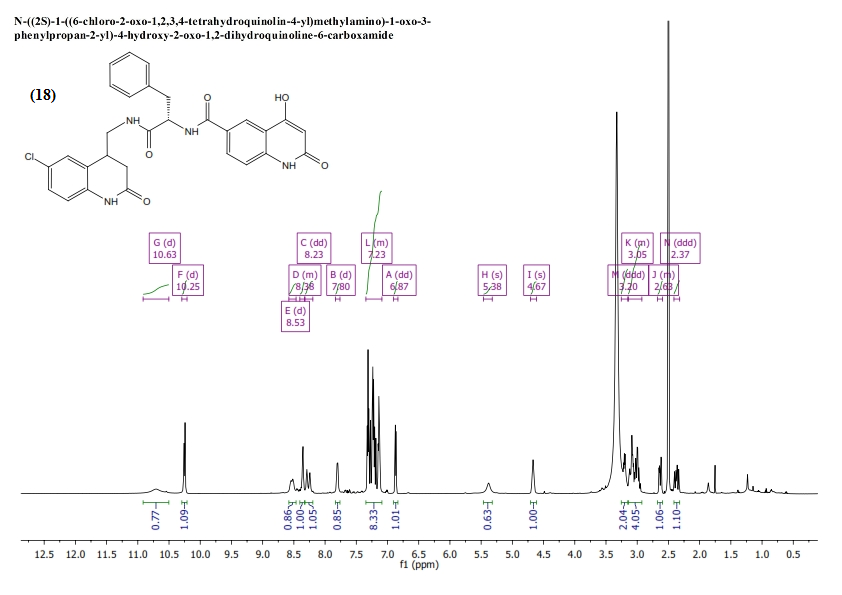


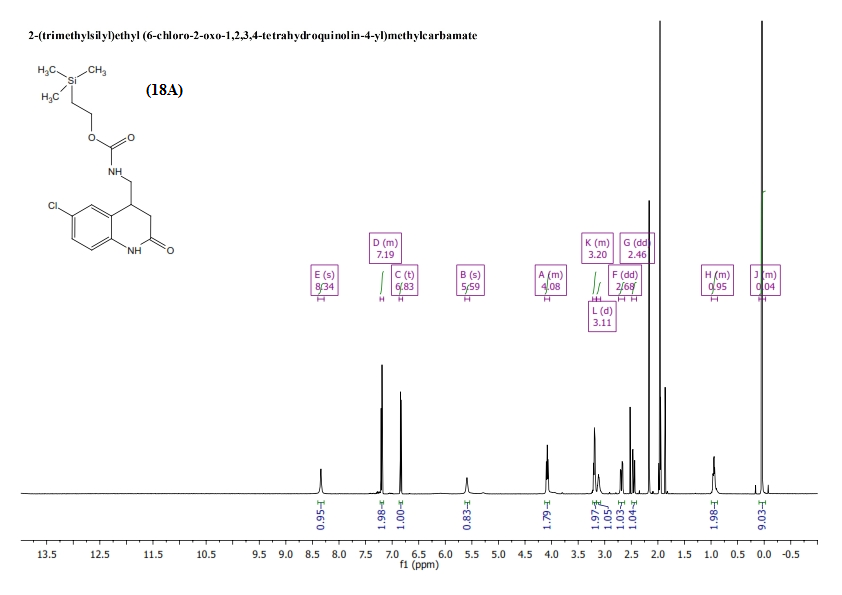


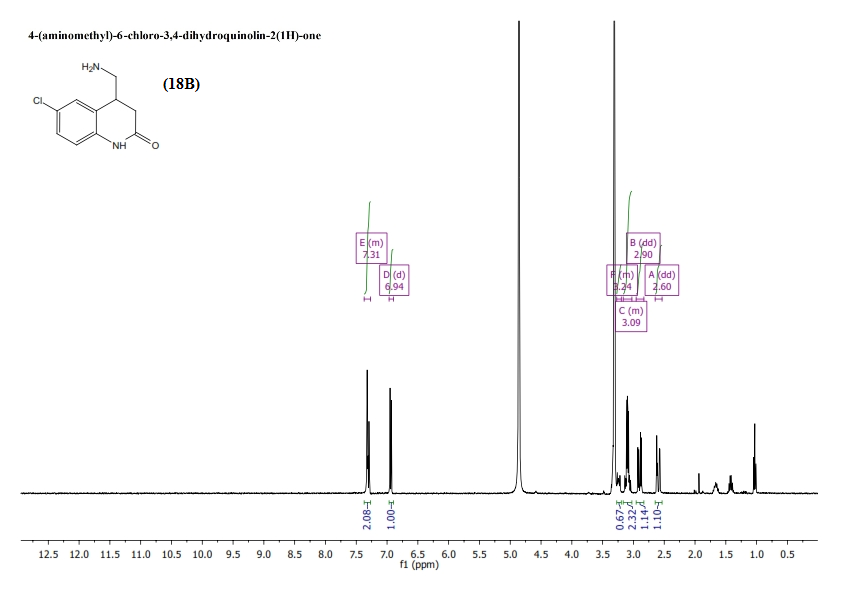


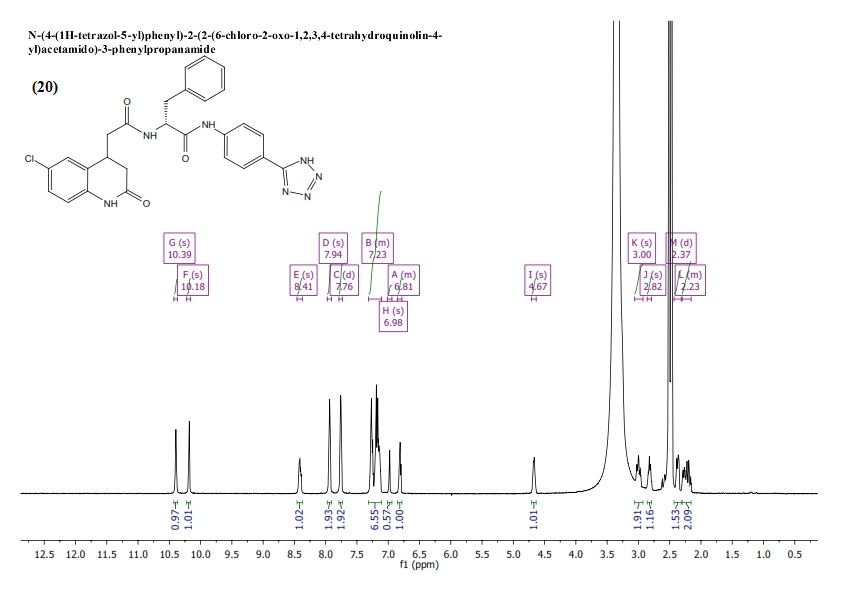


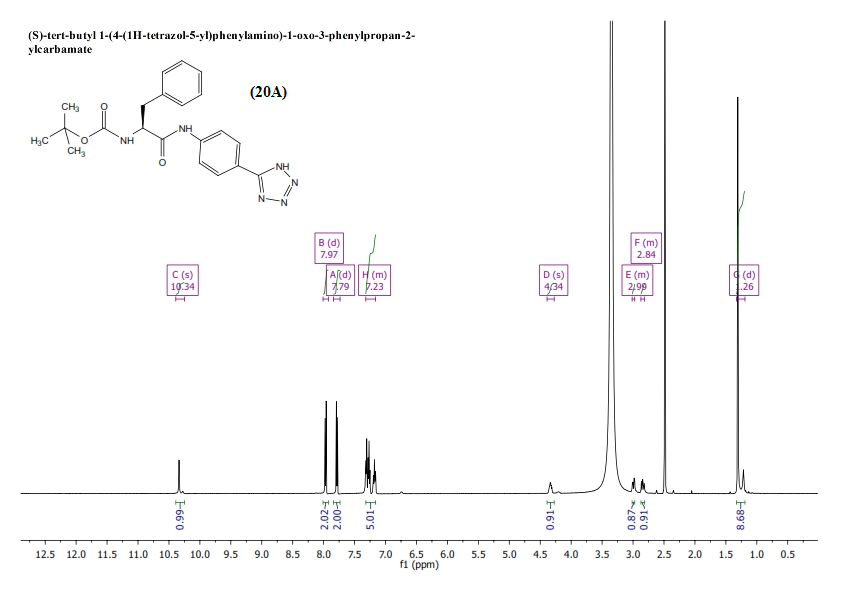


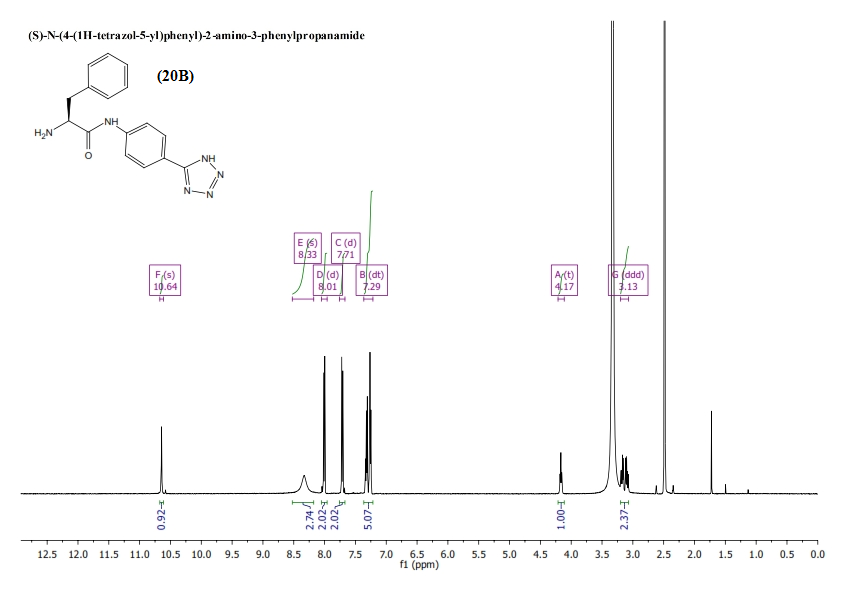


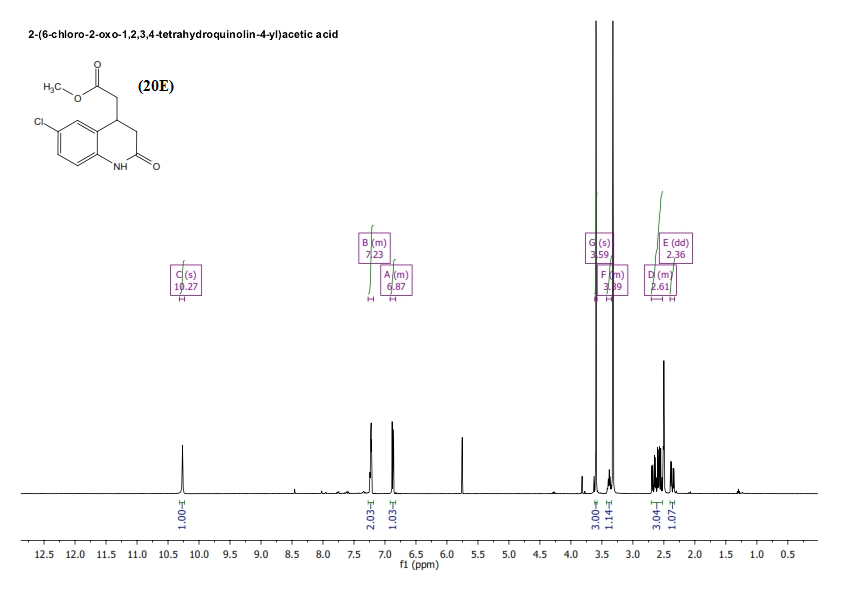


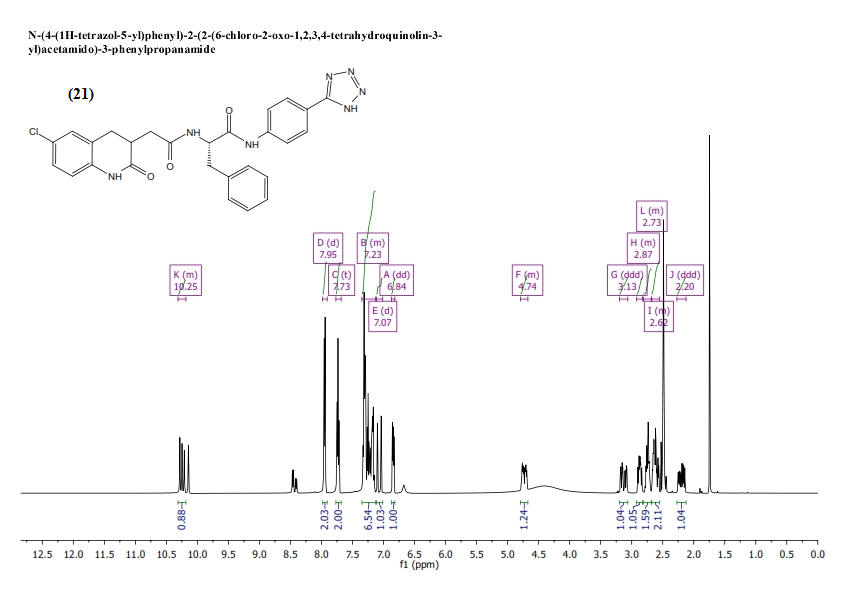


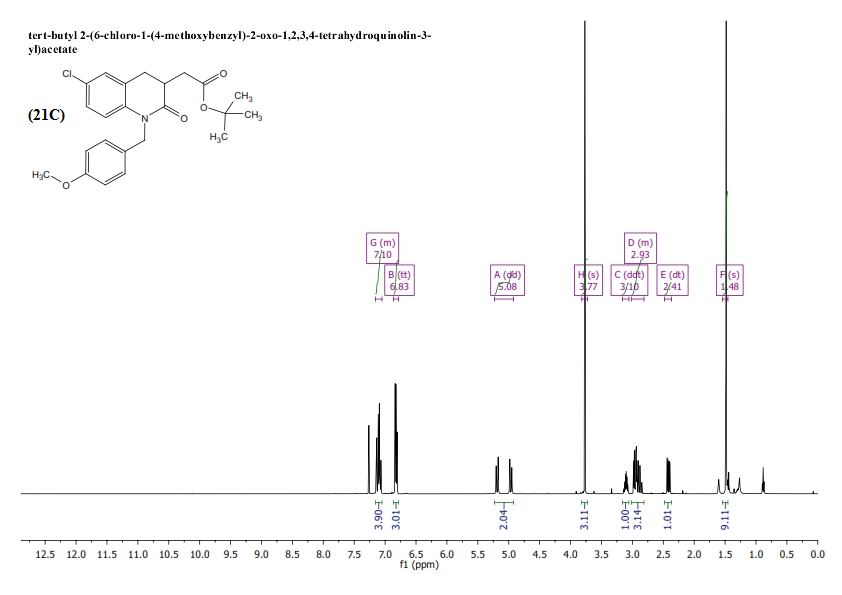


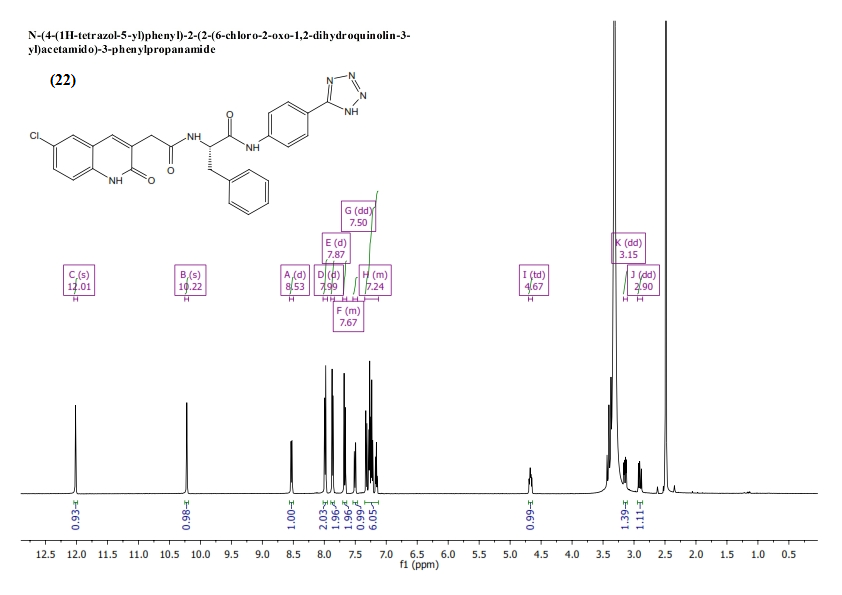


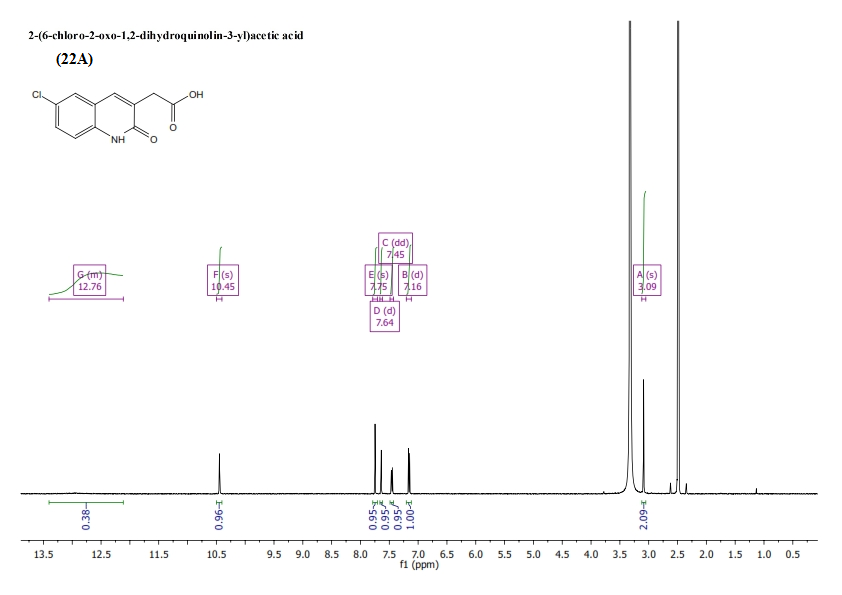


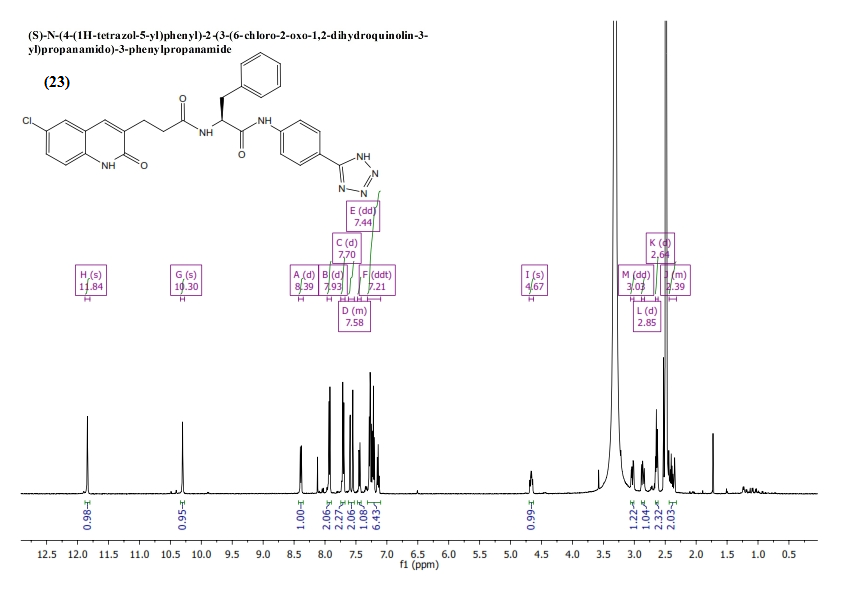


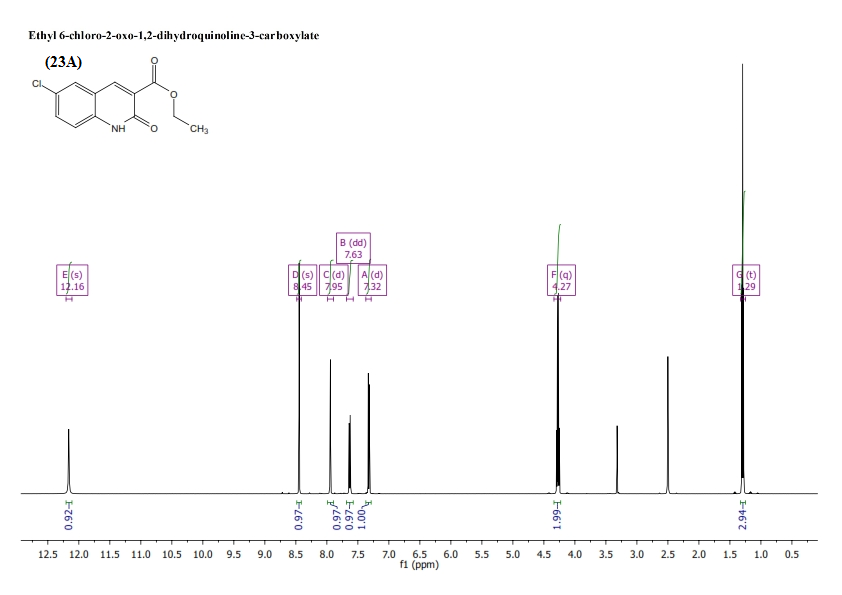


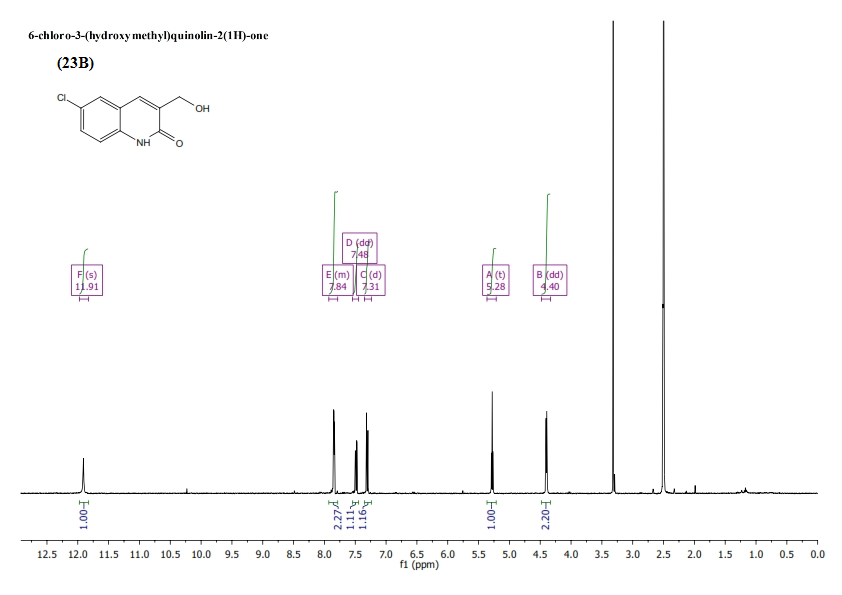


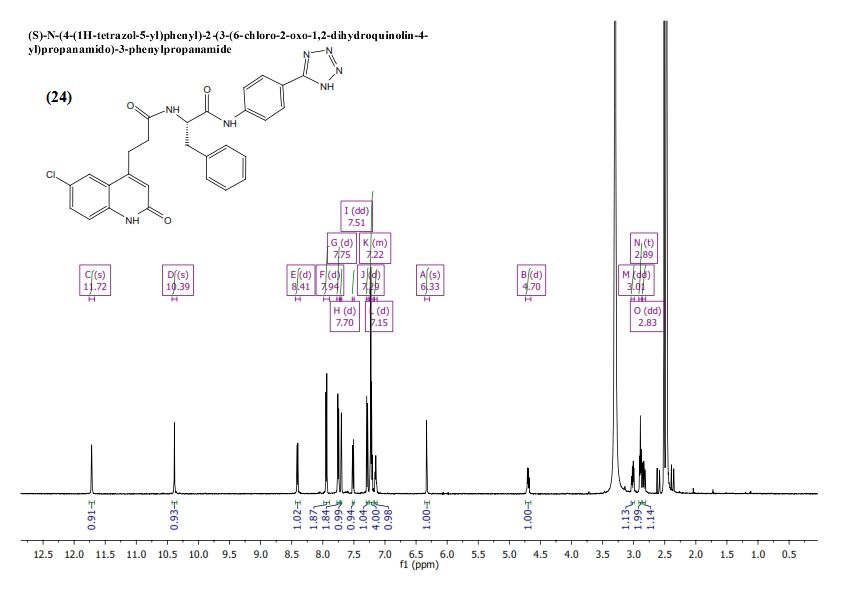


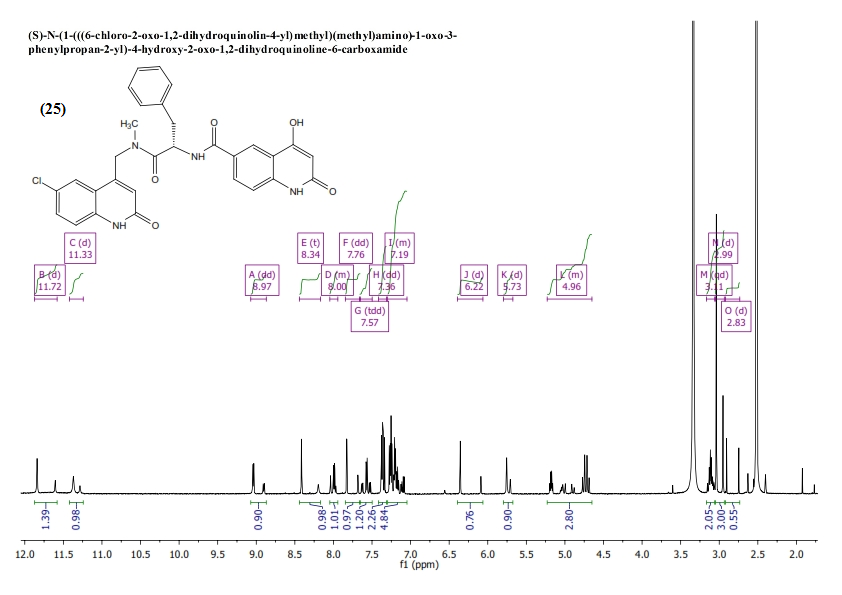


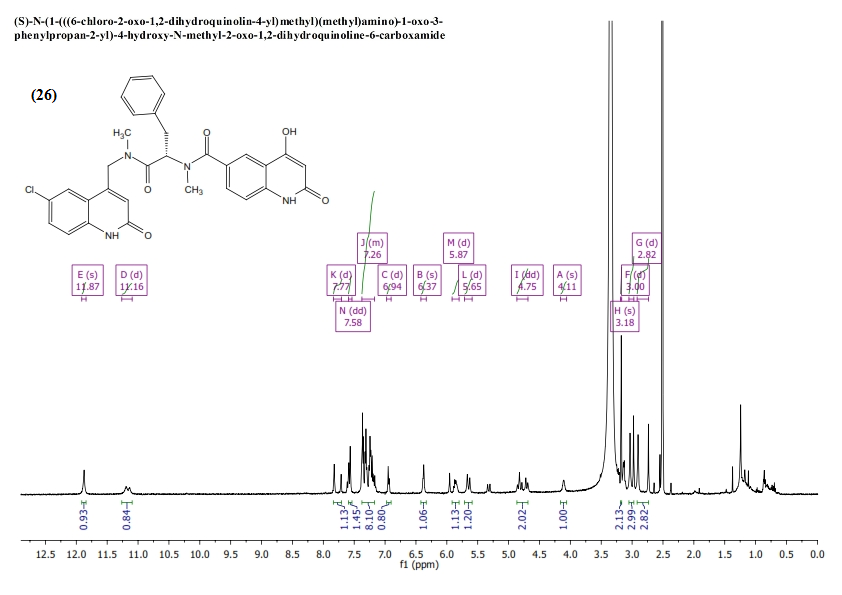


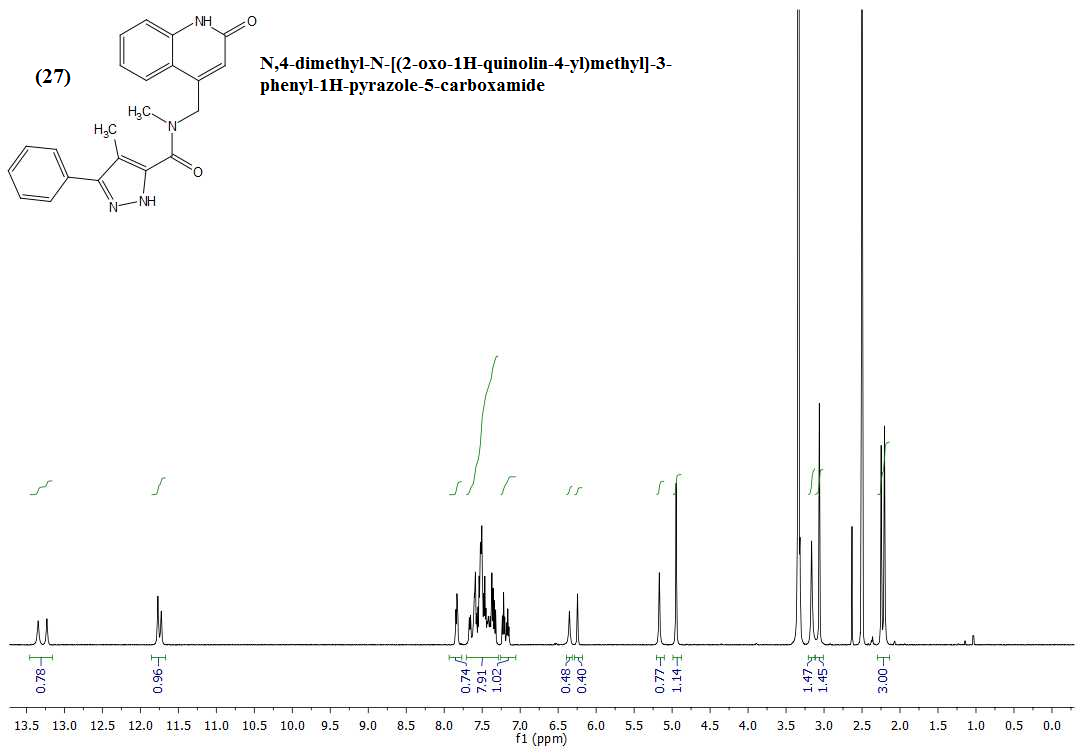


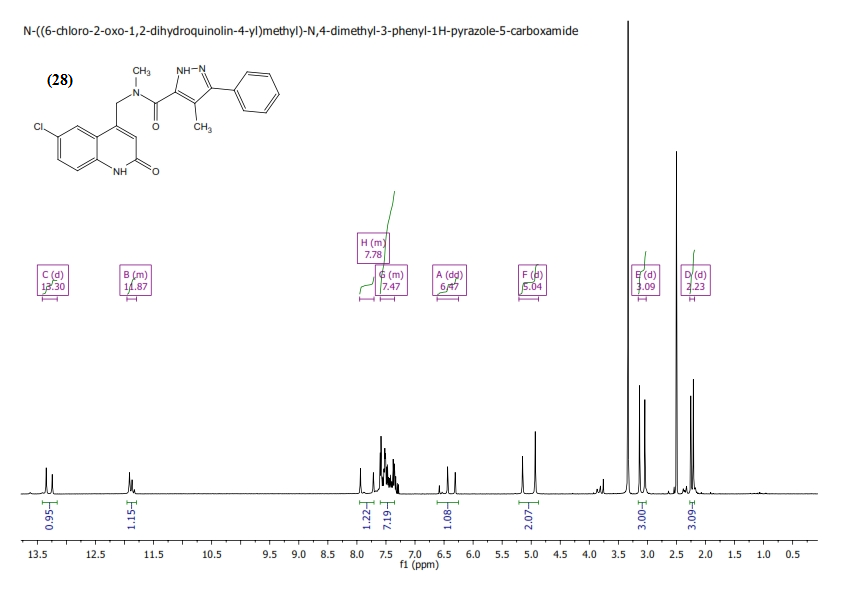

Supplement: S1 File — (DOCX) [file pone.0113705.s001.docx]
